# Supplementary material for: A pressure-induced superhard SiCN4 compound uncovered by first-principles calculations
Source: Royal Society of Chemistry journal article supplement (doi:10.1039/d3cp06272d), 2024-01-01
Supplement: d3cp06272d5.pdf [file d3cp06272d5.pdf]

Supporting information for  
**Pressure-induced superhard SiCN<sub>4</sub> compound uncovered by  
first-principles calculation**

Chengyu Wang<sup>1</sup>, Guoliang Yu<sup>1</sup>, Shoutao Zhang<sup>2</sup>, Yu Zhao<sup>3</sup>, Hui Chen<sup>1</sup>, Taimin  
Cheng<sup>1\*</sup>, Xinxin Zhang<sup>1,4\*</sup>

<sup>1</sup>College of Science, Shenyang University of Chemical Technology, Shenyang 110142, China

<sup>2</sup>School of Physics, Northeast Normal University, Changchun 130012, China

<sup>3</sup>School of Material Science and Engineering, Shenyang Jianzhu University, Shenyang 110168,  
China

<sup>4</sup>School of Materials Science and Engineering, Jilin University, Changchun 130012, China

\*E-mail addresses: chengtaimin@syuct.edu.cn (T. Cheng), zxx@syuct.edu.cn (X.  
Zhang)

**Table S1.** Structure parameters and atomic positions (Wyckoff positions) of the predicted *P4<sub>1</sub>2<sub>1</sub>2* and *Fdd2* structure at 0 GPa, and *R-3* structure at 300 GPa, respectively.

| Structure                           | Lattice parameters (Å)                                 | Atomic position (Wyckoff positions) |        |         |         |         |
|-------------------------------------|--------------------------------------------------------|-------------------------------------|--------|---------|---------|---------|
| <i>P4<sub>1</sub>2<sub>1</sub>2</i> | a = b = 4.946<br>c = 7.229<br>α = β = γ = 90°          | Si                                  | 4a     | 0.2227  | 0.2227  | 0.0000  |
|                                     |                                                        | C                                   | 4a     | 0.7768  | 0.7768  | 0.0000  |
|                                     |                                                        | N1                                  | 8b     | 0.9274  | 0.2586  | 0.5498  |
|                                     |                                                        | N2                                  | 8b     | 0.6172  | 0.7236  | 0.1655  |
| <i>Fdd2</i>                         | a = 7.725<br>b = 7.292<br>c = 5.873<br>α = β = γ = 90° | Si                                  | 8a     | 0.7500  | -0.7500 | -0.5482 |
|                                     |                                                        | C                                   | 8a     | 0.5000  | -0.5000 | -0.7518 |
|                                     |                                                        | N1                                  | 16b    | 0.4141  | -0.2979 | -0.1171 |
|                                     |                                                        | N2                                  | 16b    | 0.4657  | -0.3445 | -0.5864 |
| <i>R-3</i>                          | a = b = 5.270<br>c = 13.062<br>α = β = 90°<br>γ = 120° | Si1                                 | 3b     | 0.0000  | 0.0000  | 0.5000  |
|                                     |                                                        | Si2                                 | 9d     | -0.1667 | -0.3333 | -0.1667 |
|                                     |                                                        | C1                                  | 9e     | 0.1667  | 0.3333  | 0.3333  |
|                                     |                                                        | C2                                  | 3a     | 0.0000  | 0.0000  | 0.0000  |
|                                     |                                                        | N1                                  | 6c     | -0.0000 | 0.0000  | 0.3039  |
|                                     |                                                        | N2                                  | 6c     | -0.0000 | 0.0000  | 0.7948  |
|                                     |                                                        | N3                                  | 18f    | -0.2958 | -0.3992 | 0.3942  |
| N4                                  | 18f                                                    | -0.2377                             | 0.0255 | 0.4257  |         |         |

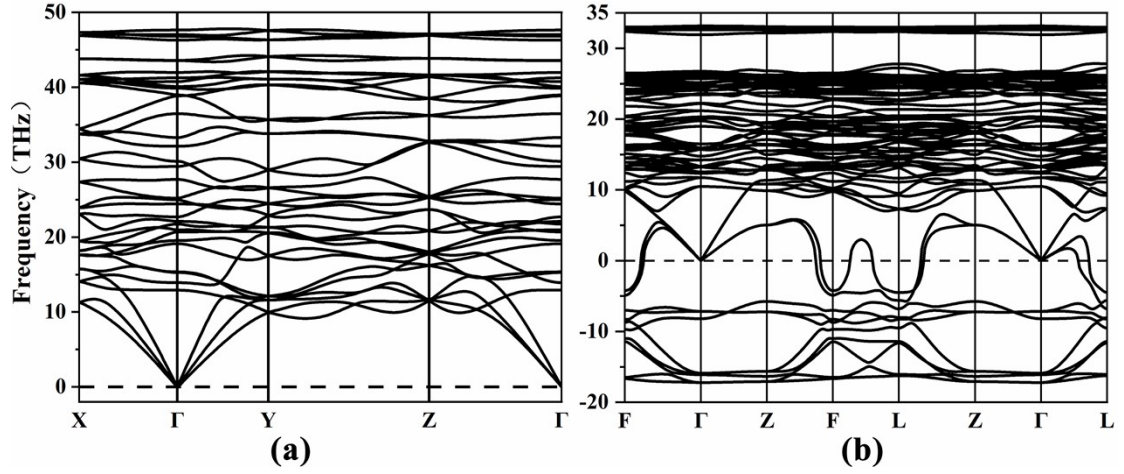

**Fig. S1.** The phonon dispersion curves of (a) *Fdd2* at 200 GPa and (b) is *R-3* at 0 GPa.

**Table S2.** The bond type and bond length of *P4<sub>1</sub>2<sub>1</sub>2* and *Fdd2* at 0 GPa, *R-3* at 300 GPa.

| Structure                           | Chemical Bonds | Bond Length(Å) |
|-------------------------------------|----------------|----------------|
| <i>P4<sub>1</sub>2<sub>1</sub>2</i> | Si-N1          | 1.76877        |
|                                     | Si-N2          | 1.78843        |
|                                     | C -N1          | 1.51672        |
|                                     | C -N2          | 1.45734        |
|                                     | N1-N2          | 1.41072        |
|                                     | Si-N1          | 1.93438        |
| <i>Fdd2</i>                         | Si-N2          | 1.81727        |
|                                     | Si-N2          | 2.05466        |
|                                     | C -N1          | 1.47930        |
|                                     | C -N2          | 1.51608        |
|                                     | N1-N2          | 1.40499        |
|                                     | Si1-N4         | 1.64219        |
| <i>R-3</i>                          | Si2-N2         | 1.60225        |
|                                     | Si2-N3         | 1.66726        |
|                                     | Si2-N4         | 1.63863        |
|                                     | C1-N1          | 1.56918        |
|                                     | C1-N3          | 1.55413        |
|                                     | C1-N4          | 1.49167        |
|                                     | C2-N3          | 1.54211        |
| N1-N2                               | 1.28958        |                |
| N3-N4                               | 1.30044        |                |

**Table S3.** Atomic charges obtained from a purely ionic model ( $Q^i$ ), Bader analysis ( $Q^B$ ) and their differences ( $\Delta Q = Q^B - Q^i$ ). The polyhedrons formed in each structure are also shown.

| Structure                                                             | Atoms | $Q^B$ | $Q^i$ | $\Delta Q$ | Atomically-bonded polyhedrons |
|-----------------------------------------------------------------------|-------|-------|-------|------------|-------------------------------|
| SiCN <sub>4</sub> - <i>P4</i> <sub>1</sub> 2 <sub>1</sub> 2<br>(0GPa) | Si    | 1.05  | 4     | -2.95      |                               |
|                                                                       | C     | 2.83  | 4     | -1.17      |                               |
|                                                                       | N1    | 6.02  | 5     | +1.02      |                               |
|                                                                       | N2    | 6.04  | 5     | +1.04      |                               |
| SiCN <sub>4</sub> - <i>Fdd</i> 2<br>(0GPa)                            | Si    | 1.06  | 4     | -2.94      |                               |
|                                                                       | C     | 2.93  | 4     | -1.07      |                               |
|                                                                       | N1    | 5.91  | 5     | +0.91      |                               |
|                                                                       | N2    | 6.09  | 5     | +1.09      |                               |
| SiCN <sub>4</sub> - <i>R-3</i><br>(300 GPa)                           | Si1   | 0.82  | 4     | -3.18      |                               |
|                                                                       | Si2   | 0.83  | 4     | -3.17      |                               |
|                                                                       | C1    | 2.74  | 4     | -1.26      |                               |
|                                                                       | C2    | 2.80  | 4     | -1.20      |                               |
|                                                                       | N1    | 5.56  | 5     | +0.56      |                               |
|                                                                       | N2    | 6.65  | 5     | +1.65      |                               |
|                                                                       | N3    | 5.88  | 5     | +0.88      |                               |
| N4                                                                    | 6.33  | 5     | +1.33 |            |                               |
| $\gamma$ -Si <sub>3</sub> N <sub>4</sub> - <i>Fd-3m</i><br>(0 GPa)    | Si1   | 0.99  | 4     | -3.01      |                               |
|                                                                       | Si2   | 1.05  | 4     | -2.95      |                               |
|                                                                       | N     | 7.24  | 5     | +2.24      |                               |

**Fig. S2.** MD simulation at 300, 1000 and 1500 K and a volume corresponding to cold pressure of 0 GPa for  $P4_12_12$  and  $Fdd2$  structures. (a), (b) and (c) are  $P4_12_12$  Energy-Time steps. (d), (e) and (f) are  $Fdd2$  Energy-Time steps.

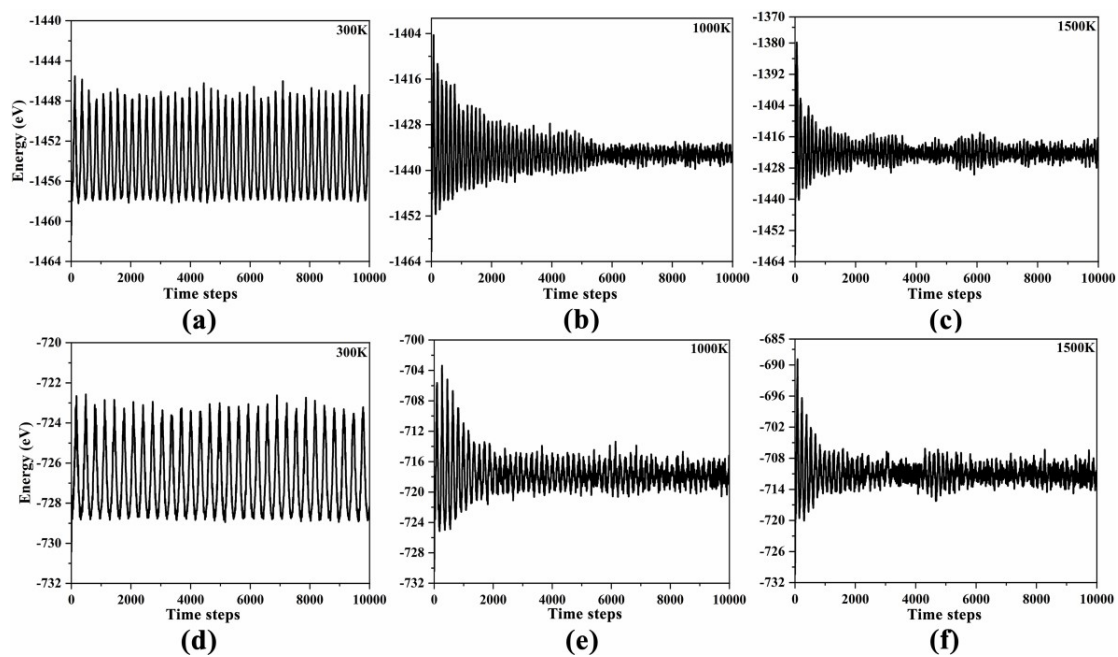

**Fig. S3.** MD simulation at 300, 1000 and 1500 K and a fixed volume correspond a cold pressure of 200 GPa for *Fdd2* and 300 GPa for *R-3* structure. (a), (b) and (c) are *Fdd2* Energy-Time steps. (d), (e) and (f) are *R-3* Energy-Time steps. (g), (h) and (i) are snapshots of the final frame of *Fdd2* at 300 K, 1000 K and 1500 K at the end of 10 ps MD simulations, and (j), (k) and (l) are that of *R-3*.

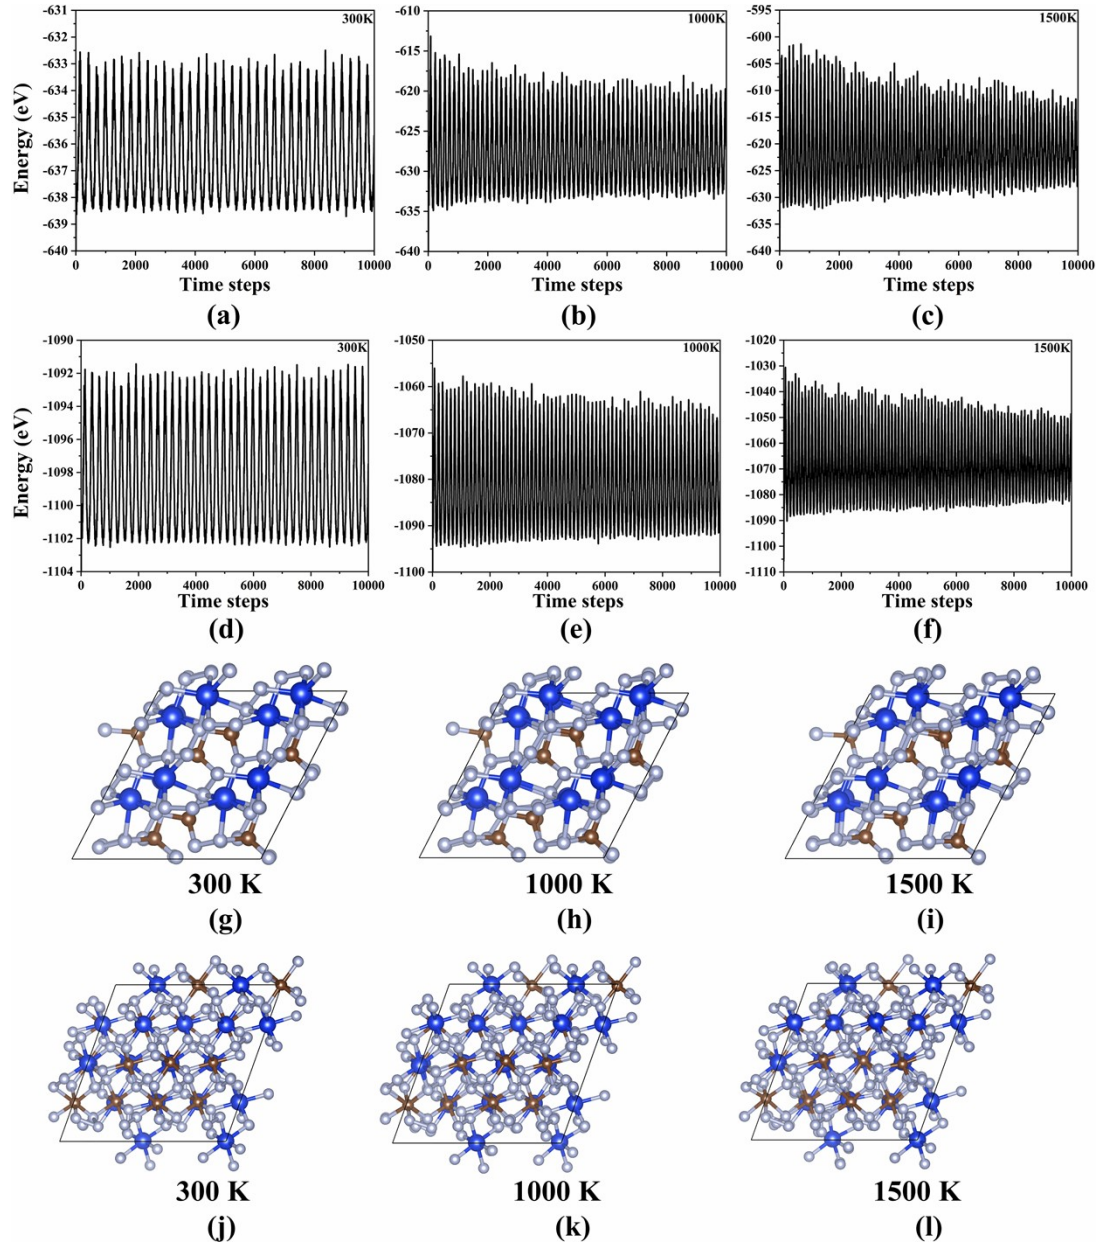

**Table S4.** The calculated elastic constants  $C_{ij}$  (GPa) of  $P4_12_12$ ,  $Fdd2$  and  $R-3$  structures at 0 GPa.

| structure  | $C_{11}$ | $C_{12}$ | $C_{13}$ | $C_{14}$ | $C_{15}$ | $C_{22}$ | $C_{23}$ | $C_{33}$ | $C_{44}$ | $C_{55}$ | $C_{66}$ |
|------------|----------|----------|----------|----------|----------|----------|----------|----------|----------|----------|----------|
| $P4_12_12$ | 654      | 59       | 179      | —        | —        | —        | —        | 836      | 365      | —        | 198      |
| $Fdd2$     | 733      | 129      | 125      | —        | —        | 952      | 97       | 771      | 351      | 323      | 396      |
| $R-3$      | 863      | 115      | 45       | 100      | 3        | —        | —        | 909      | 284      | —        | —        |
