# Supplementary figures and images for: A pressure-induced superhard SiCN4 compound uncovered by first-principles calculations
Source: Royal Society of Chemistry journal article supplement (doi:10.1039/d3cp06272d), 2024-01-01

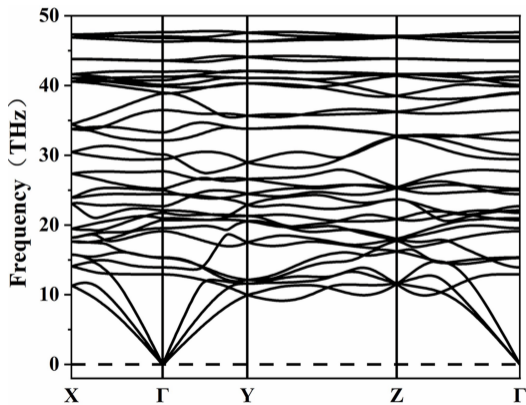

(a)

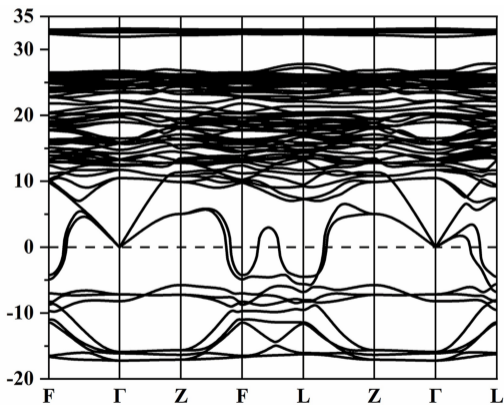

(b)

Supplement: d3cp06272d2.pdf [file d3cp06272d2.pdf]

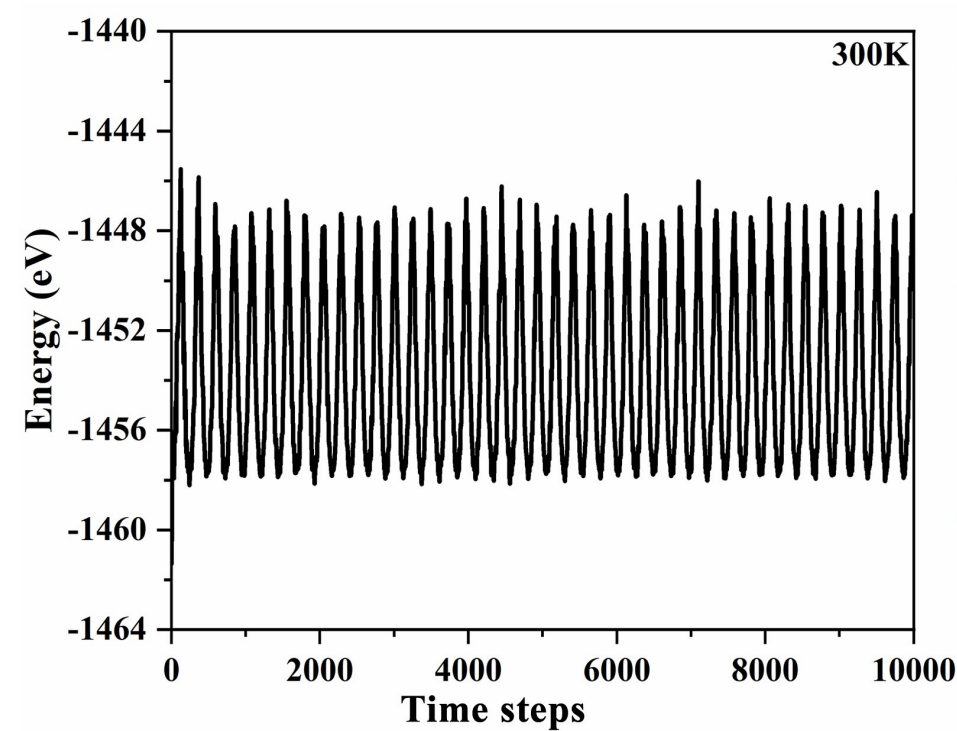

(a)

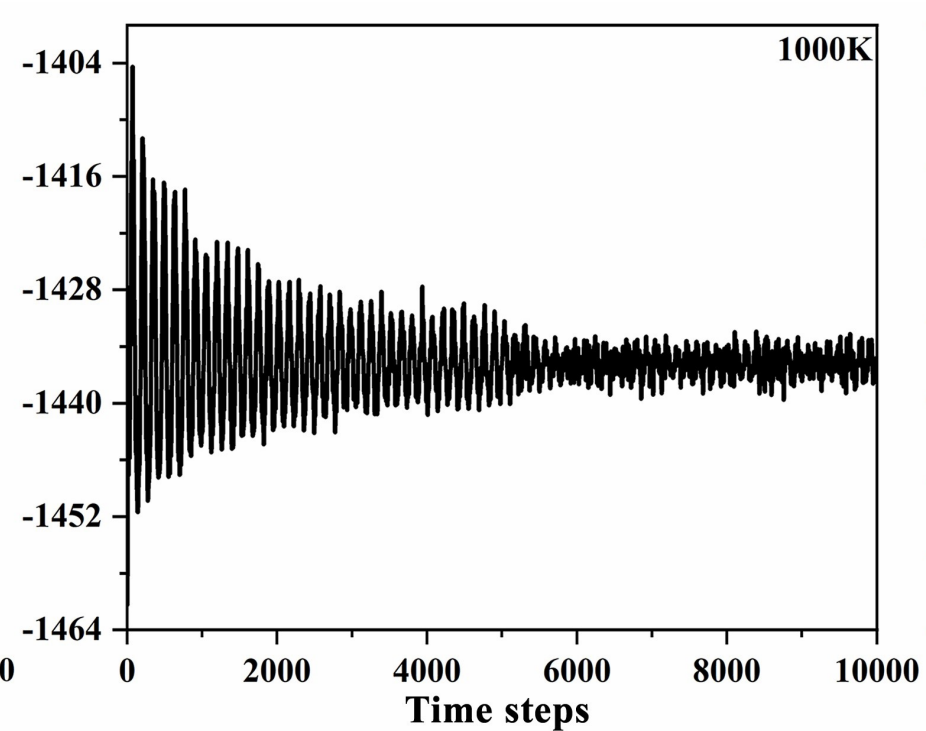

(b)

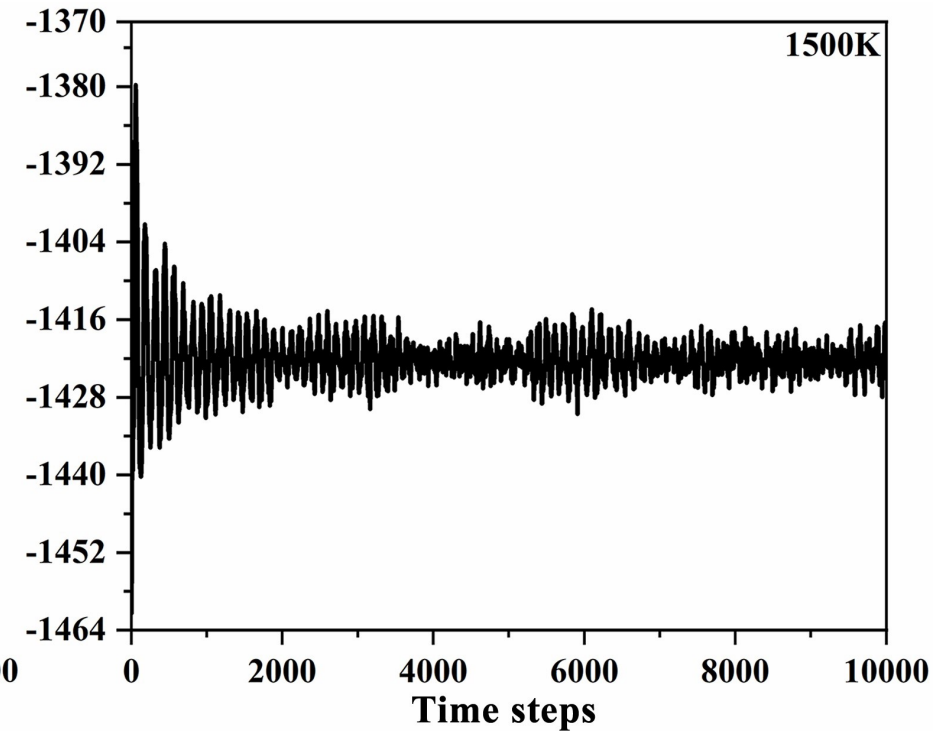

(c)

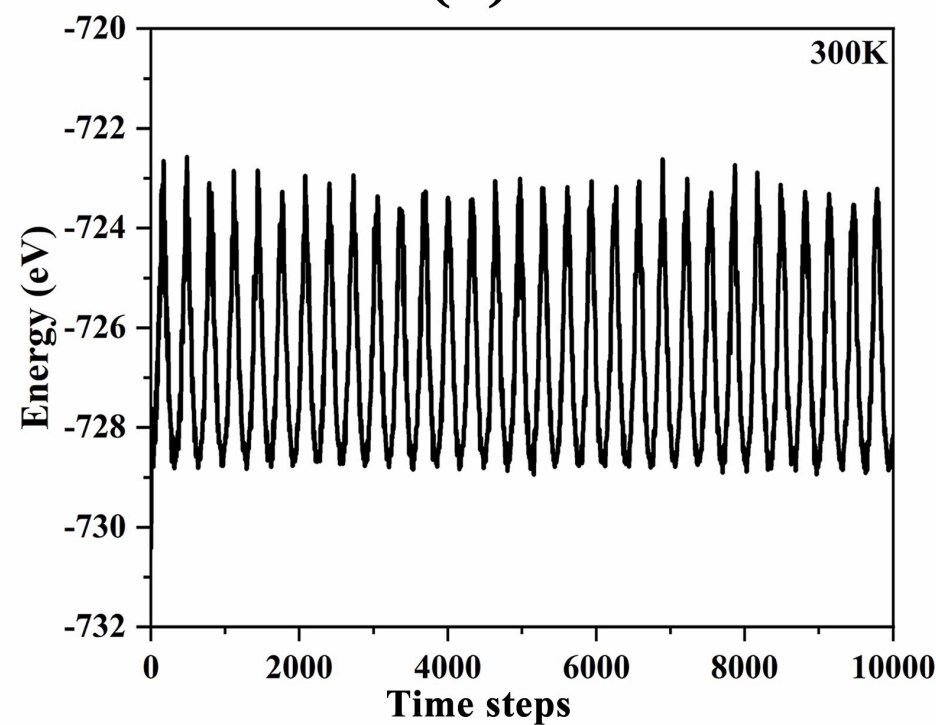

(d)

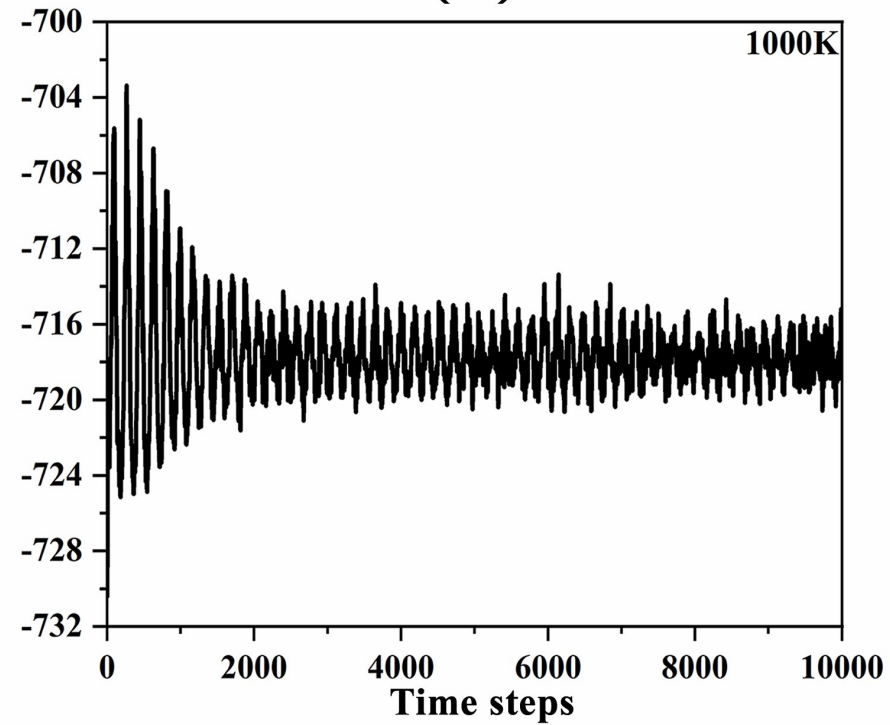

(e)

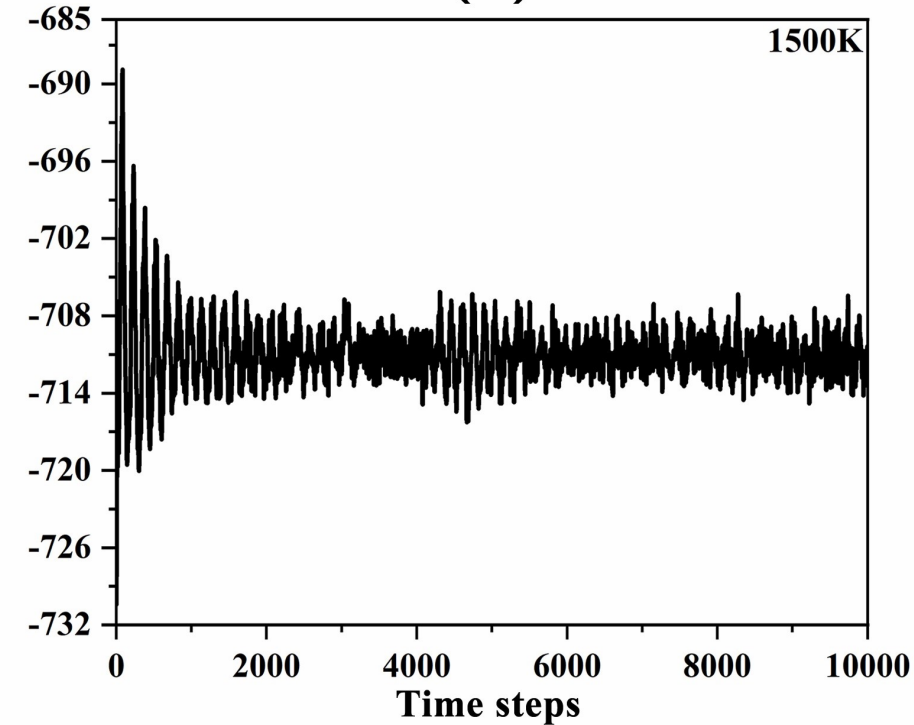

(f)

Supplement: d3cp06272d3.pdf [file d3cp06272d3.pdf]

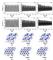

Supplement: d3cp06272d4.pdf [file d3cp06272d4.pdf]
